# Supplementary material for: A Central Role for GRB10 in Regulation of Islet Function in Man
Source: PLoS Genet. 2014 Apr 3;10(4):e1004235. doi: 10.1371/journal.pgen.1004235 (PMC3974640; doi:10.1371/journal.pgen.1004235)
Supplement: Table S3 — (A) Assessing transmissions of GRB10 rs933360 and rs6943153 alleles in the Trios from Finland and Sweden. (B) Parent-of-origin effect of GRB10 rs933360 on parameters of insulin secretion and insulin action, and glucose levels during OGTT in the non-diabetic offspring from the Trio cohorts. (XLS) [file pgen.1004235.s011.xls]

## Sheet: Tab S3A
Table S3A. Assessing transmissions of GRB10 rs933360 and rs6943153 alleles in the Trios from Finland and Sweden.
I. Transmissions of major allele A of SNP rs933360 to affected offspring
	TDT				FBAT
Trait	G	A	CHISQ	P	fam#	P-value
T2D	195	258	7.447	0.0063	96	0.26
Hyperglycemia	115	105	5.121	0.024	196	0.21
G allele shows decreased and A allele shows increased transmission to affected (T2D and hyperglycemic) offspring
II. Transmissions of minor allele G of SNP rs933360 to unaffected offspring
	TDT				FBAT
Trait	G	A	CHISQ_COM	P_COM	fam#	P-value
Non-diabetic	461	393	4.951	0.026	na	na
Non-hyperglycemic	361	316	2.733	0.098	na	na
A allele shows decreased and G allele shows increased transmission to non-diabetic offspring
III. Transmissions of minor allele T of SNP rs6943153 to affected offspring
	TDT				FBAT
Trait	T	C	CHISQ	P	fam#	P-value
T2D	97	84	0.9337	0.3339	105	0.36
Hyperglycemia	231	190	3.993	0.0456	207	0.035
T allele shows increased transmissions to hyperglycemic offspring
IV. Transmissions ofminor allele T of SNP rs6943153 to unaffected offspring
	TDT				FBAT
Trait	T	C	CHISQ	P	fam#	P-value
Non-diabetic	460	427	1.099	0.2945	na	na
Non-hyperglycemic	354	345	0.1034	0.7477	na	na
V. Transmissions of SNPs rs933360 and rs6943153 from T2D-affected parent to a T2D-affected offspring
rs933360		G untransmitted
	G transmitted	A transmitted	CHISQ	P-value
Diabetic fathers to diabetic offspring	6	15	3.857	0.049
Diabetic mothers to diabetic offspring	11	19	2.133	0.144
Diabetic parents to diabetic offspring (1 affected parent)	17	34	5.666	0.017
rs6943153		T untransmitted
	T transmitted	C transmitted	CHISQ	P-value
Diabetic fathers to diabetic offspring	10	21	3.903	0.048
Diabetic mothers to diabetic offspring	15	9	1.5	0.144
Diabetic parents to diabetic offspring (1 affected parent)	25	30	0.454	0.22
VI. Transmissions of SNPs rs933360 and rs6943153 from an hyperglycemic parent to a hyperglycemic offspring
rs933360		G untransmitted
	G transmitted	A transmitted	CHISQ	P
Hyperglycemic fathers to hyperglycemic offspring	9	21	4.8	0.028
Hyperglycemic mothers to hyperglycemic offspring	15	26	2.951	0.08
Hyperglycemic parents to hyperglycemic offspring (1 affected parent)	24	47	7.451	0.006
rs6943153		T untransmitted
	T transmitted	C transmitted	CHISQ	P
Hyperglycemic fathers to hyperglycemic offspring	14	23	2.189	0.13
Hyperglycemic mothers to hyperglycemic offspring	21	20	0.0243	0.87
Hyperglycemic parents to hyperglycemic offspring (1 affected parent)	35	43	0.82	0.36
TDT	transmission disequilibrium test
FBAT	family based association test
CHISQ	Combined test statistic / TDT chi-square statistic
P	asymptotic P - value
fam#	number of families
P	empirical P values corrected for possible linkage
Hyperglycemia	T2D/IGT/IFG
VII. Test for distorted transmission of alleles from non diabetic parents to non diabetic offspring for quantitative traits*
Fasting glucose
		QTDT
SNP	Effect/Other	df(0)	-LnLk(0)	df(T)	-LnLk(T)	ChiSq	p	effect	probands
rs933360	A/G	2786	-2422.1	2785	-2421.33	1.54	NS	na	789/2792
rs6943153	T/C	2725	2217.87	2724	2220.58	5.42	0.0199	0.031	766/2731
Fasting insulin
		QTDT
SNP	Effect/Other	df(0)	-LnLk(0)	df(T)	-LnLk(T)	ChiSq	p	effect	probands
rs933360	A/G	2714	2536.5	2713	2532.17	8.68	0.0032	-0.021	760/2720
rs6943153	T/C	2666	2496.85	2665	2491.07	11.56	0.0007	0.012	768/2672
Parent of origin tests
1 hr glucose
SNP	Effect/Other	df(0)	-LnLk(0)	df(T)	-LnLk(T)	ChiSq	p	effect	probands
rs933360	A/G	274	44.99	273	42.79	4.41	0.035		188/282	POE
	A/G	88	14.6	87	14.21	0.78	NS	0.032	94	maternal
	A/G	88	17.74	87	16.41	2.65	ns	-0.009	94	paternal
rs6943153	T/C	240	24.48	239	23.68	1.6	ns		160/248	POE
	T/C	61	6.06	60	5.21	1.7	NS	0.03	67	maternal
	T/C	87	-0.21	86	-0.5	0.58	ns	0.046	93	paternal
2 hr glucose
SNP	Effect/Other	df(0)	-LnLk(0)	df(T)	-LnLk(T)	ChiSq	p	effect	probands
rs933360	A/G	283	0.42	282	-0.78	2.4	ns		194/291	POE
	A/G	92	5.27	91	5.79	1.06	ns	0.038	98	maternal
	A/G	90	6.44	89	4.52	3.85	0.049	-0.037	96	paternal
rs6943153	T/C	252	2.89	251	0.58	4.61	0.0317		170/260	POE
	T/C	68	-4.4	67	-3.56	1.68	ns	-0.028	78	maternal
	T/C	90	5.49	89	7.48	3.98	0.0461	0.083	96	paternal
*only the significant results are displayed
-LnLk(0)	null hypothesis likelihood test statistic
-LnLk(T)	alternate hypothesis likelihood test statistic
df	degrees of freedom
CHISQ	QTDT chi-square statistic
P	P - value

## Sheet: Tab S3B
Table S3B. Parent-of-origin effect of GRB10 rs933360 on parameters of insulin secretion and insulin action, and glucose levels during OGTT in the non-diabetic offspring from the Trio cohorts.
		ApAm vs GpAm* (paternal)				ApAm vs ApGm* (maternal)				GpAm vs ApGm* (parental)				GpGm* vs GpAm (maternal)
Phenotype	Study	N	Beta	SE	P	N	Beta	SE	P	N	Beta	SE	P	N	Beta	SE	P
Insulin response to glucose during OGTT
CIR	Fin-Swe	705	-0.05	0.078	0.518	750	-0.089	0.072	0.213	391	-0.039	0.091	0.669	313	0.054	0.101	0.595
	Amish	493	-0.059	0.088	0.501	531	-0.107	0.079	0.178	192	-0.017	0.106	0.871	134	-0.017	0.15	0.912
	Kuopio	118	-0.288	0.195	0.143	105	-0.685	0.229	0.003	79	-0.397	0.237	0.098	108	-0.247	0.196	0.209
	Meta-analysis	1316	-0.0732061	0.0559195	0.190489	1386	-0.127284	0.0518336	0.0140639	662	-0.0584041	0.0662904	0.378299	555	-0.0112256	0.077036	0.884143
ISI	Fin-Swe	691	-0.064	0.083	0.438	738	0.034	0.076	0.656	389	0.098	0.096	0.307	310	0.204	0.107	0.058
	Amish	496	0.01	0.048	0.829	533	0.064	0.043	0.135	191	0.05	0.066	0.452	134	-0.073	0.081	0.371
	Kuopio	117	0.14	0.194	0.473	105	0.408	0.206	0.05	78	0.268	0.238	0.264	106	0.444	0.208	0.035
	Meta-analysis	1304	-0.0020306	0.0406304	0.96014	1376	0.0679489	0.0368223	0.064991	658	0.0754602	0.05302	0.154667	550	0.0644963	0.0616775	0.295698
DI	Fin-Swe	686	-0.104	0.075	0.167	730	-0.047	0.069	0.498	382	0.057	0.088	0.514	305	0.18	0.098	0.067
	Amish	493	-0.054	0.096	0.575	530	-0.046	0.085	0.584	191	0.008	0.113	0.947	134	-0.073	0.146	0.617
	Kuopio	117	-0.187	0.202	0.356	105	-0.377	0.231	0.105	78	-0.19	0.234	0.419	106	0.057	0.197	0.773
	Meta-analysis	1296	-0.0930884	0.0567238	0.10078	1365	-0.0634653	0.0521862	0.223934	651	0.0200129	0.0665618	0.763668	545	0.094943	0.0752063	0.206793
Ins30adjBMI	Fin-Swe	710	-0.003	0.081	0.973	758	-0.072	0.074	0.33	398	-0.069	0.093	0.459	318	-0.02	0.104	0.845
	Amish	493	-0.032	0.063	0.607	531	-0.109	0.058	0.062	192	-0.052	0.088	0.554	134	-0.051	0.116	0.658
	Kuopio	118	-0.403	0.179	0.026	105	-0.705	0.201	0.001	79	-0.303	0.232	0.195	108	-0.241	0.205	0.243
	Meta-analysis	1321	-0.0484353	0.0479145	0.312079	1394	-0.124844	0.0445156	0.00503953	669	-0.0771732	0.0616238	0.210451	560	-0.0596846	0.0724396	0.409984
Increm30	Fin-Swe	707	0.034	0.081	0.674	754	-0.011	0.074	0.884	399	-0.045	0.094	0.633	319	-0.015	0.105	0.889
	Amish	488	-0.017	0.083	0.835	526	-0.08	0.084	0.338	190	-0.038	0.141	0.789	133	-0.011	0.144	0.94
	Kuopio	118	-0.362	0.175	0.041	105	-0.525	0.191	0.007	79	-0.164	0.201	0.417	108	-0.139	0.19	0.468
	Meta-analysis	1313	-0.0275748	0.0550292	0.616305	1385	-0.0788563	0.0533191	0.139154	668	-0.0587781	0.072889	0.420009	560	-0.0344564	0.0774684	0.656479
Ins30	Fin-Swe	714	0.022	0.083	0.787	761	-0.044	0.076	0.561	399	-0.066	0.096	0.489	319	-0.059	0.107	0.581
	Amish	494	-0.031	0.063	0.627	532	-0.116	0.06	0.053	192	-0.046	0.093	0.622	134	0.012	0.115	0.916
	Kuopio	118	-0.387	0.19	0.044	105	-0.588	0.209	0.006	79	-0.201	0.222	0.368	108	-0.203	0.208	0.331
	Meta-analysis	1326	-0.0361036	0.0485178	0.456798	1398	-0.112497	0.0459412	0.0143366	670	-0.0677463	0.0639637	0.289538	561	-0.0480353	0.0733093	0.512312
AUCIns	Fin-Swe	699	0.069	0.083	0.404	742	-0.027	0.077	0.723	393	-0.097	0.097	0.317	314	-0.126	0.108	0.246
	Amish	466	0.013	0.052	0.799	503	-0.1	0.047	0.036	181	-0.129	0.081	0.113	134	0.022	0.101	0.824
	Kuopio	117	-0.211	0.197	0.287	105	-0.491	0.21	0.021	78	-0.28	0.232	0.231	106	-0.448	0.204	0.031
	Meta-analysis	1282	0.0173589	0.0430033	0.686461	1350	-0.0946491	0.0394045	0.0163064	652	-0.126852	0.0600543	0.0346614	554	-0.0934148	0.0693721	0.178117
AUCIns/AUCGluc	Fin-Swe	691	0.027	0.079	0.733	738	-0.051	0.072	0.476	389	-0.078	0.091	0.391	310	-0.07	0.102	0.491
	Amish	462	0.008	0.049	0.877	499	-0.103	0.046	0.024	179	-0.114	0.072	0.116	134	0.042	0.097	0.664
	Kuopio	117	-0.291	0.188	0.125	105	-0.64	0.203	0.002	78	-0.349	0.227	0.128	106	-0.432	0.204	0.036
	Meta-analysis	1270	-0.000950698	0.0406552	0.981344	1342	-0.10735	0.038076	0.00481208	646	-0.11464	0.0547942	0.036421	550	-0.0558457	0.0664562	0.400719
Glucose levels during OGTT
Glu fast	Fin-Swe	807	0.146	0.046	0.001	857	0.048	0.042	0.248	442	-0.098	0.053	0.065	353	-0.193	0.059	0.001
	Amish	497	0.065	0.065	0.319	535	0.012	0.055	0.826	192	0.02	0.096	0.833	134	-0.061	0.107	0.57
	Kuopio	137	0.043	0.069	0.539	124	0.019	0.081	0.816	79	-0.022	0.089	0.805	109	-0.094	0.072	0.195
	Meta-analysis	1441	0.101613	0.0329813	0.00206356	1516	0.0324546	0.0308623	0.292986	713	-0.0600847	0.0411431	0.144185	596	-0.139034	0.0419768	0.000925774
Glu 30	Fin-Swe	777	0.109	0.129	0.399	824	0.113	0.117	0.338	431	0.004	0.149	0.98	344	-0.252	0.166	0.13
	Amish	495	0.161	0.198	0.418	533	0.022	0.177	0.901	192	-0.052	0.23	0.822	134	-0.065	0.298	0.828
	Kuopio	136	0.051	0.245	0.834	123	0.407	0.264	0.126	79	0.336	0.271	0.218	109	0.106	0.229	0.646
	Meta-analysis	1408	0.112522	0.0988889	0.255179	1480	0.12401	0.0915473	0.175546	702	0.0486351	0.113546	0.668412	587	-0.117918	0.122518	0.335821
Glu 120	Fin-Swe	779	0.097	0.121	0.422	825	0.052	0.111	0.639	432	-0.045	0.14	0.747	346	-0.094	0.156	0.546
	Amish	500	0.085	0.196	0.667	538	-0.01	0.175	0.954	192	-0.142	0.227	0.531	133	-0.122	0.274	0.658
	Kuopio	137	-0.113	0.245	0.646	124	0.072	0.257	0.78	79	0.174	0.326	0.596	109	-0.001	0.263	0.996
	Meta-analysis	1416	0.062665	0.0949193	0.509131	1487	0.038649	0.0880603	0.660739	703	-0.0427675	0.111918	0.702363	588	-0.0798923	0.120501	0.507329
* Reference group
p = paternal allele. m = maternal allele.
Results with p values < 0.05 are in bold type.
Fin-Swe = Trios from Finland and Sweden. Amish = Amish Family Diabetes Study. Kuopio = Kuopio Offspring Study.
